# Supplementary material for: Stability of High‐Quality Warfarin Anticoagulation in a Community‐Based Atrial Fibrillation Cohort: The Anticoagulation and Risk Factors in Atrial Fibrillation (ATRIA) Study
Source: PubMed Central journal article supplement — J Am Heart Assoc. 2016 Jul 22;5(7):e003482. doi: 10.1161/JAHA.116.003482 (PMC5015384; doi:10.1161/jaha.116.003482), 2016-07-22
Supplement: JAH3-5-e003482-s001.pdf [file JAH3-5-e003482-s001.pdf]

# **SUPPLEMENTAL MATERIAL**

**Table S1.** Characteristics of patients with and without 9 months of continuous warfarin use following initial prescription

| Variable*                     | Patients <u>with at least</u>             | Patients <u>without 9</u>               | P value <sup>†</sup> |
|-------------------------------|-------------------------------------------|-----------------------------------------|----------------------|
|                               | 9 months of<br>continuous warfarin<br>use | months of<br>continuous warfarin<br>use |                      |
|                               | N (%)                                     | N (%)                                   |                      |
| All                           | 2928 (100%)                               | 1532 (100%)                             |                      |
| Age                           |                                           |                                         | 0.60                 |
| ≥75 years                     | 1264 (43.2%)                              | 656 (42.8%)                             |                      |
| Sex                           |                                           |                                         | 0.022                |
| Women                         | 1272 (43.4%)                              | 611 (39.9%)                             |                      |
| Race                          |                                           |                                         | 0.002                |
| White                         | 2555 (87.3%)                              | 1291 (84.3%)                            |                      |
| Diabetes mellitus             |                                           |                                         | 0.87                 |
| Yes                           | 480 (16.4%)                               | 254 (16.6%)                             |                      |
| Hypertension                  |                                           |                                         | 0.089                |
| Yes                           | 1611 (55.0%)                              | 802 (52.3%)                             |                      |
| Coronary artery disease       |                                           |                                         | 0.60                 |
| Yes                           | 813 (27.8%)                               | 414 (27.0%)                             |                      |
| Heart failure                 |                                           |                                         | 0.79                 |
| Yes                           | 779 (26.6%)                               | 402 (26.2%)                             |                      |
| Peripheral artery disease     |                                           |                                         | 0.62                 |
| Yes                           | 74 (2.5%)                                 | 35 (2.3%)                               |                      |
| Renal impairment <sup>‡</sup> |                                           |                                         | 0.72                 |

| Variable*                                                    | Patients <u>with at least</u>             | Patients <u>without 9</u>               | P value† |
|--------------------------------------------------------------|-------------------------------------------|-----------------------------------------|----------|
|                                                              | 9 months of<br>continuous warfarin<br>use | months of<br>continuous warfarin<br>use |          |
|                                                              | N (%)                                     | N (%)                                   |          |
| Yes                                                          | 360 (12.3%)                               | 194 (12.7%)                             |          |
| Prior stroke                                                 |                                           |                                         | 0.020    |
| Yes                                                          | 279 (9.5%)                                | 114 (7.4%)                              |          |
| Cancer                                                       |                                           |                                         | 0.012    |
| Yes                                                          | 342 (11.7%)                               | 219 (14.3%)                             |          |
| Prior bleed                                                  |                                           |                                         | 0.019    |
| Yes                                                          | 162 (5.5%)                                | 112 (7.3%)                              |          |
| Beta blockers                                                |                                           |                                         | 0.79     |
| Yes                                                          | 969 (33.1%)                               | 513 (33.5%)                             |          |
| Anti-arrhythmics                                             |                                           |                                         | 0.073    |
| Yes                                                          | 484 (16.5%)                               | 286 (18.7%)                             |          |
| Calcium channel blockers                                     |                                           |                                         | 0.68     |
| Yes                                                          | 764 (26.1%)                               | 391 (25.5%)                             |          |
| ATRIA score at admission§                                    |                                           |                                         | 0.18     |
| 0-5                                                          | 1500 (51.2%)                              | 824 (53.8%)                             |          |
| 6                                                            | 418 (14.3%)                               | 200 (13.1%)                             |          |
| ≥7                                                           | 1010 (34.5%)                              | 508 (33.2%)                             |          |
| CHA <sub>2</sub> DS <sub>2</sub> -VASc score at<br>admission |                                           |                                         | 0.001    |
| 0                                                            | 168 (5.7%)                                | 134 (8.7%)                              |          |

| <b>Variable*</b> | <b>Patients with at least</b>              | <b>Patients without 9</b>                | <b>P value†</b> |
|------------------|--------------------------------------------|------------------------------------------|-----------------|
|                  | <b>9 months of continuous warfarin use</b> | <b>months of continuous warfarin use</b> |                 |
|                  | <b>N (%)</b>                               | <b>N (%)</b>                             |                 |
| 1                | 457 (15.6%)                                | 265 (17.3%)                              |                 |
| ≥2               | 2303 (78.7%)                               | 1133 (74.0%)                             |                 |

\*Variables assessed at the beginning of the 15-month follow-up period.

†Univariate p values from chi-square tests.

‡Estimated glomerular filtration rate <45 ml/min/1.73m<sup>2</sup> or end stage renal disease.

§ ATRIA risk score includes prior stroke, age, sex, diabetes, congestive heart failure, hypertension, proteinuria, and eGFR<45 or ESRD.<sup>36</sup>

||CHA<sub>2</sub>DS<sub>2</sub>VASc score includes congestive heart failure, hypertension, age, diabetes mellitus, stroke/TIA/thromboembolism, vascular disease, and sex.<sup>37</sup>
